# Supplementary material
Source: PubMed Central journal article supplement (PMC6235171)
Supplement: NIHMS995301-supplement-S1_Data.pdf [file NIHMS995301-supplement-S1_Data.pdf]

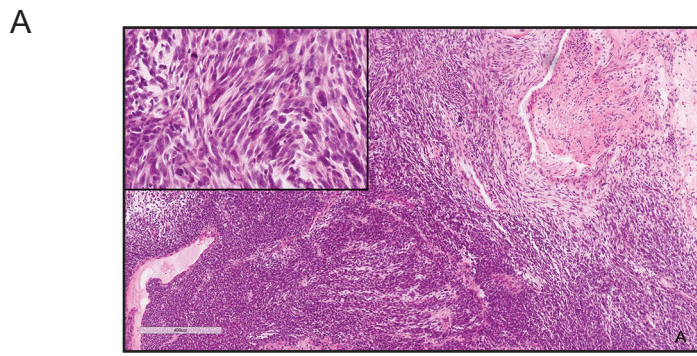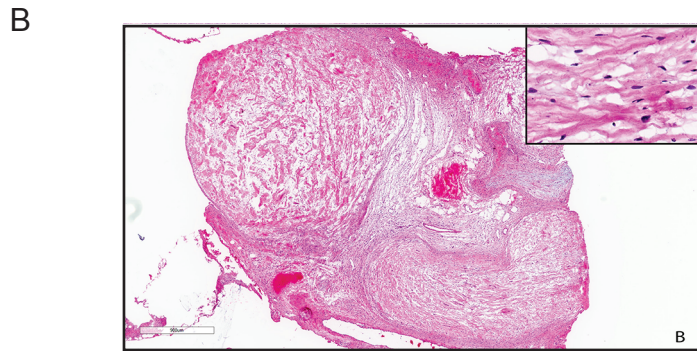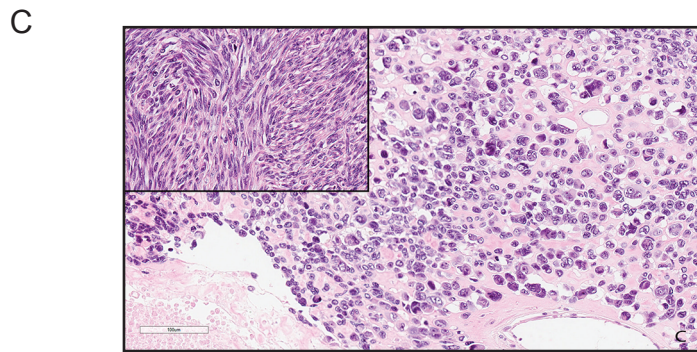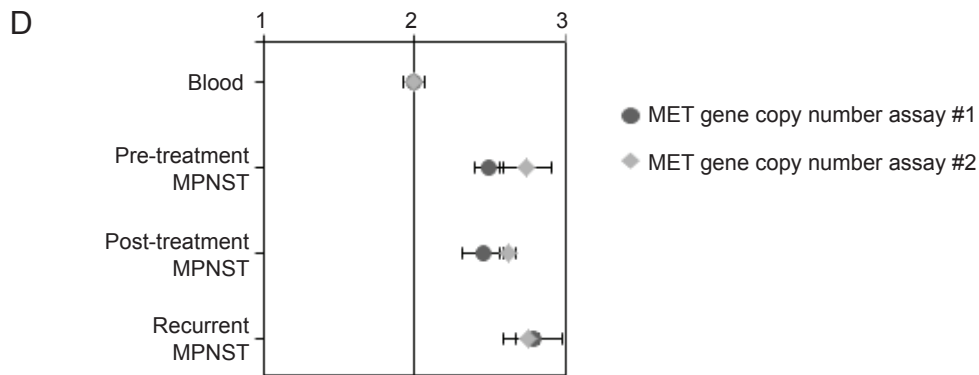

**Supplemental Figure 1: Histological and *MET* copy number changes during MPNST progression.**

A) Hematoxylin and eosin (H&E) section shows neurofibroma (upper right) undergoing malignant transformation into adjacent hypercellular spindle cell neoplasm with nuclear pleomorphism and mitotic activity, arranged in intersecting fascicles with focal myxoid changes and occasional polygonal shaped (epithelioid) tumor cells, consistent with malignant peripheral nerve sheath tumor (MPNST) [Main image magnification 112x; inset magnification 200x].

B) Low-power magnification of chest wall nerve shows multinodular configuration of expanded nerve fascicles involved by bland slender spindle cells with wavy configuration and tapered ends with admixed collagen bundles and focal myxoid changes, consistent with plexiform neurofibroma. (Main image magnification 24x; inset magnification 200x).

C) High-power magnification of post-treatment tumor shows marked nuclear pleomorphism and prominent epithelioid morphology situated within dense fibrous stroma with focal tumor necrosis (bottom left corner). Focal areas (inset) retained spindle cell morphology with classical intersecting fascicles (herringbone pattern) of MPNSTs (Main image magnification 24x; inset magnification 200x).

D) Copy number changes in *MET* were confirmed with quantitative PCR using two assays. Average copy number is reported relative to blood DNA (N=2). Error bars indicate the standard error from technical triplicates.
