# Supplementary material
Source: PubMed Central journal article supplement (PMC6235171)
Supplement: NIHMS995301-supplement-S1_Table.pdf [file NIHMS995301-supplement-S1_Table.pdf]

| Sample                                   | # of r26-MET plasmid FISH Signals | r26-MET plasmid Integration Sites (Approximation)                                                                                                  | Chr Count and Ploidy Level    |
|------------------------------------------|-----------------------------------|----------------------------------------------------------------------------------------------------------------------------------------------------|-------------------------------|
| NF1-MET spleen<br>Mouse #951             | 2 [2]<br>3 [16]<br>4 [2]          | 6E, 14E1 [2]<br>6E, 6E, 14E1 [13] / 6E, 11B5, 14E1 [3]<br>6E, 6E, 11B5, 14E1 [2]                                                                   | 40<2n> [20]                   |
| NF1-MET MPNST<br>Mouse #951              | 3 [10]<br>4 [6]<br>6 [2]<br>8 [2] | 6E, 6E, 14E1 [10]<br>6E, 6E, 6E, 14E1 [2] / 6E, 6E, 11B5, 14E1 [4]<br>6E, 6E, 6E, 6E, 14E1, 14E1 [2]<br>6E, 6E, 6E, 6E, 11B5, 11B5, 14E1, 14E1 [2] | 39~40<2n>[16]<br>79~80<4n>[4] |
| NF1-MET MPNST<br>Mouse #981              | 2 [1]<br>3 [10]<br>4 [3]<br>6 [6] | 6E, 14E1 [1]<br>6E, 6E, 14E1 [10]<br>6E, 6E, 11B5, 14E1 [3]<br>6E, 6E, 6E, 6E, 14E1, 14E1 [6]                                                      | 40~41<2n>[14]<br>80~82<4n>[6] |
| NF1-MET MPNST<br>Mouse #981<br>Xenograft | 2 [3]<br>3 [16]<br>6 [1]          | 6E, 14E1 [1] / 6E, 6E [2]<br>6E, 6E, 14E1 [16]<br>6E, 6E, 6E, 6E, 14E1, 14E1 [1]                                                                   | 40~42<2n>[19]<br>82<4n>[1]    |

**Supplemental Table 1: Summary of R26-MET transgene localization.** Interphase FISH analysis spleen and MPNST cells from NF1-MET mice was performed and the r26-MET (green) signal was assessed. Note that several tumors had diploid and tetraploid cells present.
