# Supplementary material
Source: PubMed Central journal article supplement (PMC6235171)
Supplement: NIHMS995301-supplement-S2_Table.pdf [file NIHMS995301-supplement-S2_Table.pdf]

| Chromosome                     | 6A2/5A2 | Total Cells Counted |
|--------------------------------|---------|---------|---------|---------|---------|---------|---------|---------------------|
| # of FISH signals              | 2O/2R   | 2O/3R   | 3O/2R   | 4O/2R   | 6O/2R   | 6O/4R   | 8O/4R   |                     |
| Sample                         |         |         |         |         |         |         |         |                     |
| NF1-MET<br>MPNST<br>Mouse #981 | 100.0%  | -       | -       | -       | -       | -       | -       | 200                 |
| NF1<br>MPNST<br>Mouse #986     | 87.5%   | 12.5%   | -       | -       | -       | -       | -       | 200                 |
| NF1-P53<br>MPNST<br>Mouse#7900 | 32.5%   | -       | 4.0%    | 49.5%   | 3.0%    | 5.0%    | 6.0%    | 200                 |

**Supplemental Table 2: Copy number analysis of *Met* and *Hgf* in murine MPNST models.** Relative copy number of *Met* and *HGF* was measured using dual-color interphase FISH on tumor touch preps from NF1-MET, NF1-P53, and NF1 MPNSTs. A summary of the FISH signals for the 6A2-1 and 6A2-2 (mouse *Met*) orange, and 5A2-2 (mouse *Hgf*) red is shown.
