# Supplementary material
Source: PubMed Central journal article supplement (PMC6235171)
Supplement: NIHMS995301-supplement-S3_Data.pdf [file NIHMS995301-supplement-S3_Data.pdf]

NF1-MET  
Spleen  
Mouse #951

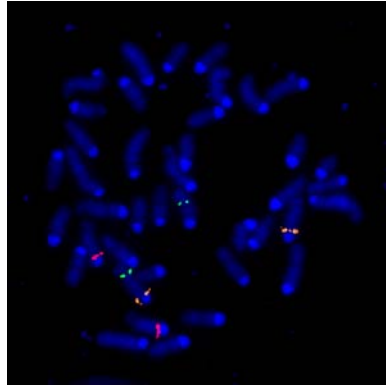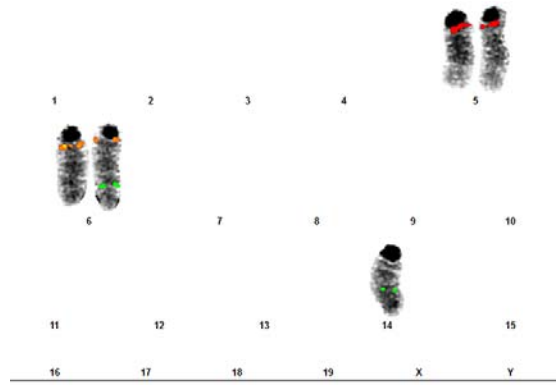

NF1-MET  
MPNST  
Mouse #951

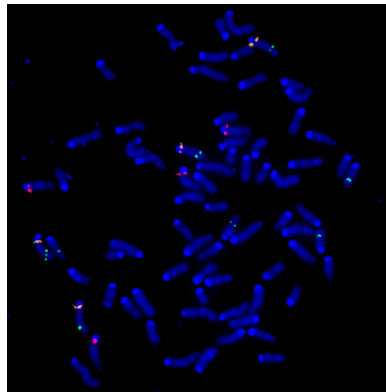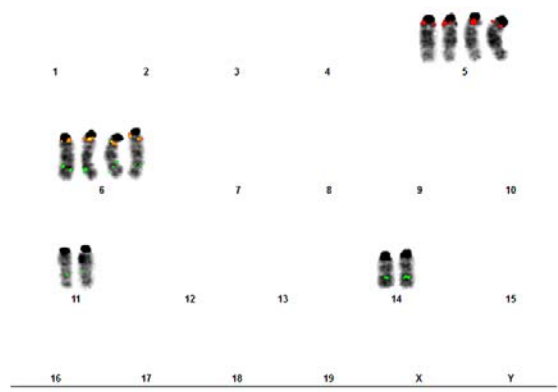

NF1-MET  
MPNST  
Mouse #981

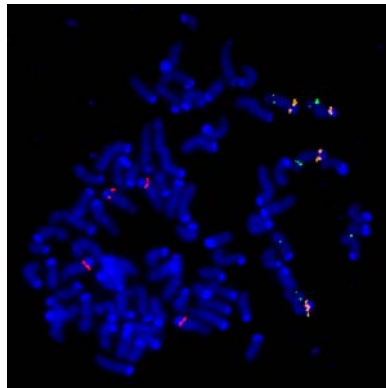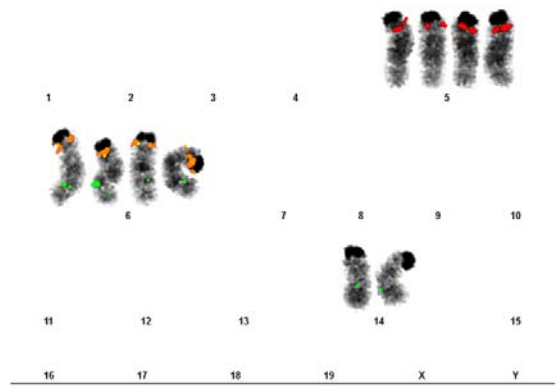

**Supplementary Figure 3:** Metaphase FISH analysis of R26-MET transgene. FISH probes r26-MET plasmid green, 6A2-1 (mouse Met) orange, and 5A2-2 (mouse HGF) red were used on normal spleen and MPNSTs from NF1-MET mice.
