# Supplementary material
Source: PubMed Central journal article supplement (PMC6235171)
Supplement: NIHMS995301-supplement-S4_Data.pdf [file NIHMS995301-supplement-S4_Data.pdf]

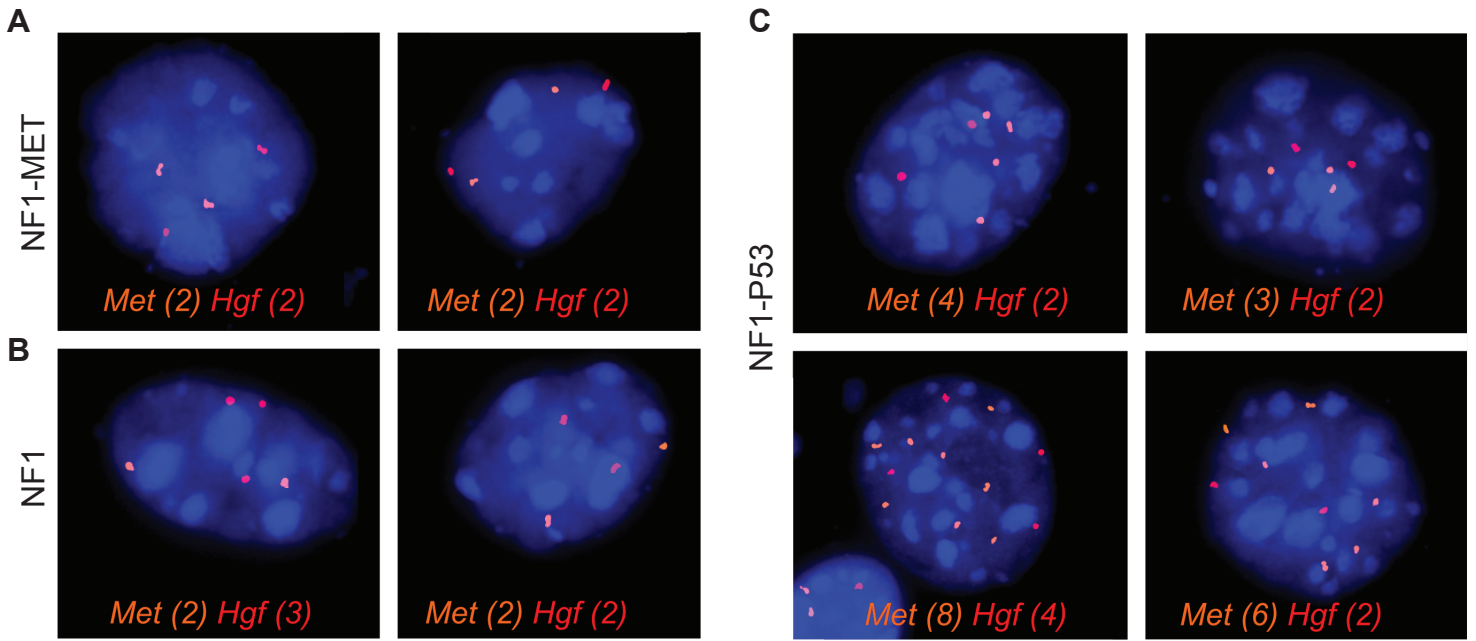

**Supplemental Figure 4:** Interphase FISH demonstrates copy number gain of *Met* and *Hgf* in NF1-MET, NF1-P53, and NF1 MPNSTs. (A) No changes in endogenous *Met* (orange signal) and *Hgf* (red) copy number are observed in an MPNST from a NF1-MET mouse (*MET* transgene presence was confirmed, see Supplemental Figure 1). (B) Gain in endogenous *Hgf* copy number is observed in 12.5% of cells in a NF1 MPNST. (C) Gains in endogenous *Met* copy number is observed in an NF1-P53 MPNST with 4 copies in 49.5% of cells, 3 copies in 4% of cells, 6 copies in 5% of cells. An additional 6% of cells appear tetraploid with 8 copies of *Met* and 4 copies of *Hgf*. DAPI counterstain is shown in blue. Sample sizes and experimental details in Supplemental Table 3.
