# Supplementary material
Source: PubMed Central journal article supplement (PMC6235171)
Supplement: NIHMS995301-supplement-S5_Data.pdf [file NIHMS995301-supplement-S5_Data.pdf]

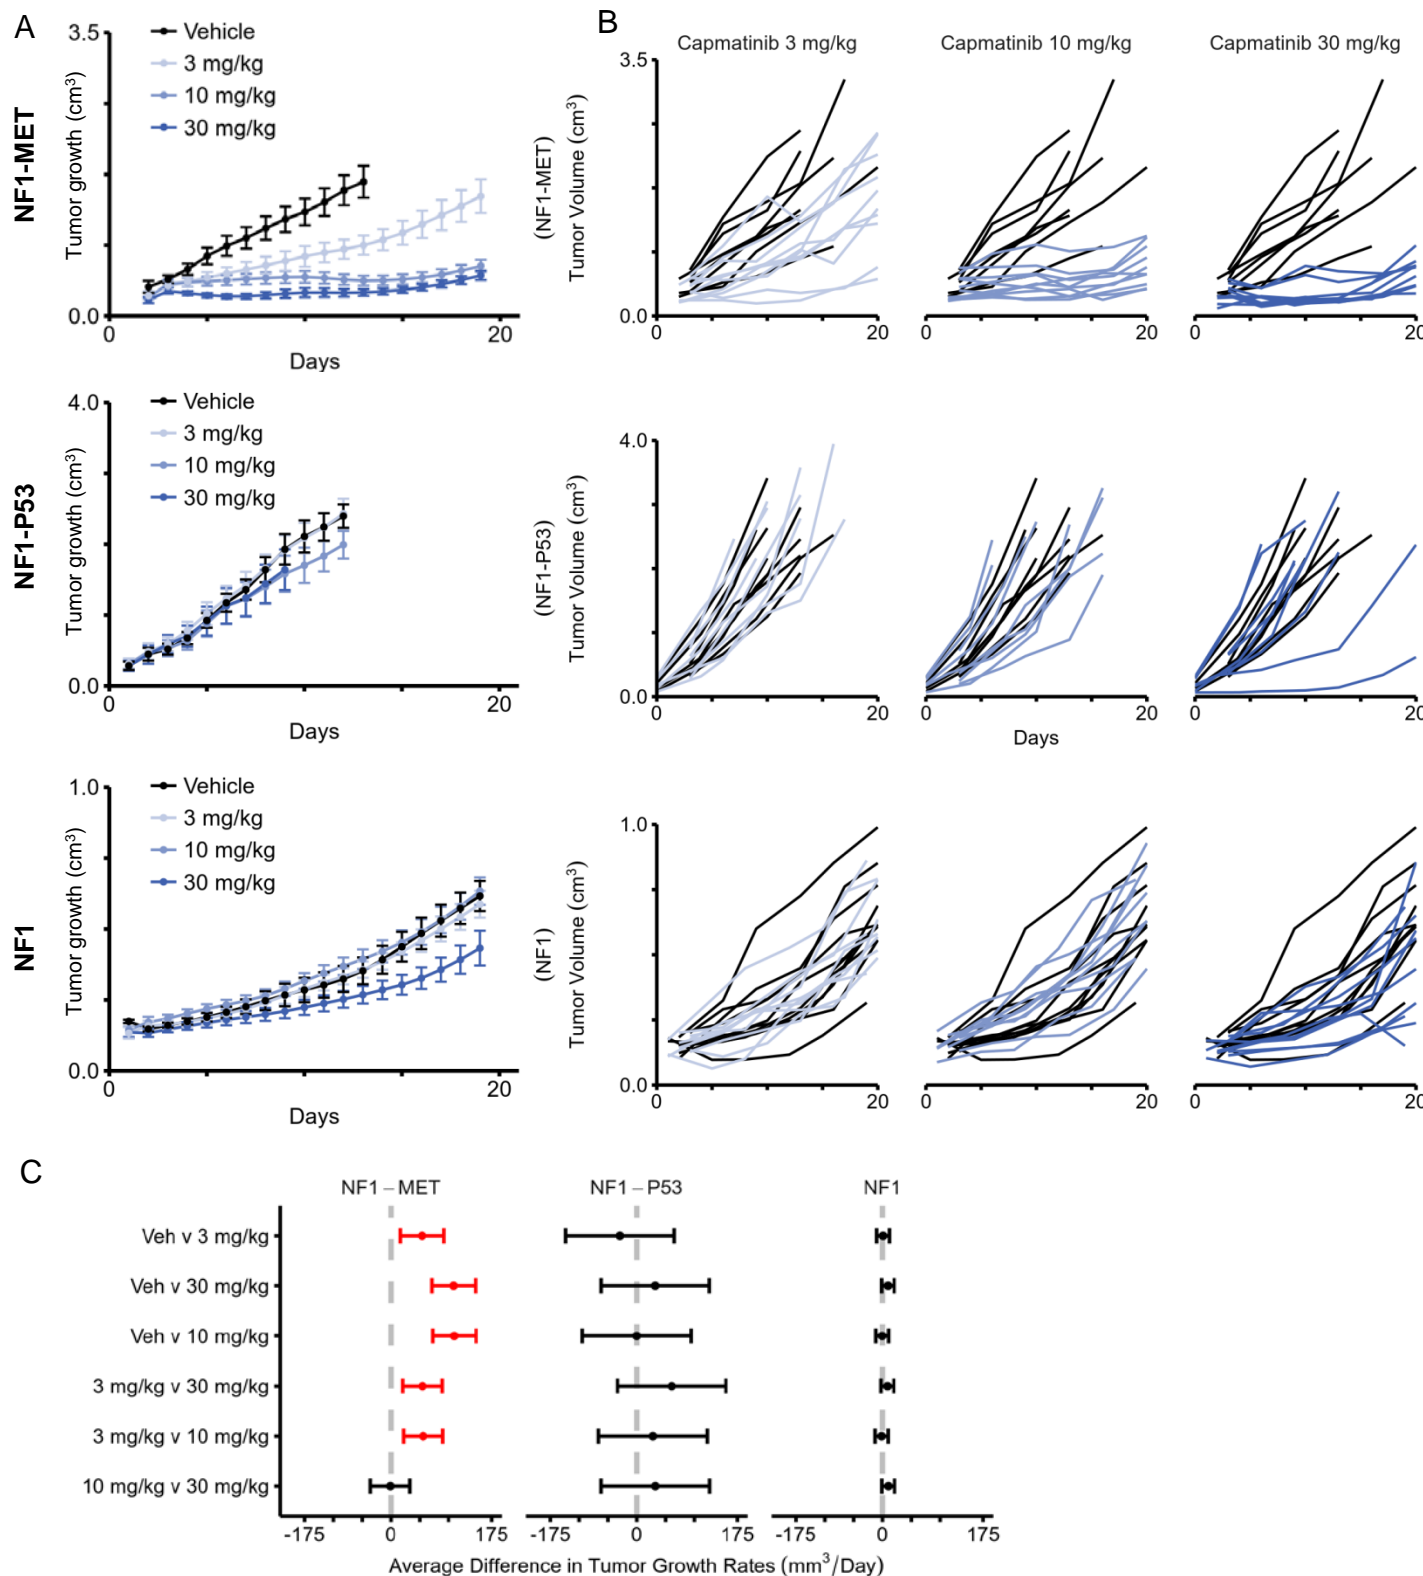

**Supplemental Figure 5:** Tumorgrafts are differentially sensitive to MET inhibition with capmatinib. (A) Spline interpolated means and standard errors are plotted at each timepoint (N=8 mice per group). Tumor volume was imputed using last observation carried forward, until animal was euthanized. Curves terminate once >50% of mice have been euthanized in the respective treatment group. (B) Individual tumor growth plotted by line and treatment over 20 days. Vehicle treated tumors are represented by black lines. (C) Estimated mean differences between all treatments with 95% false coverage intervals by comparison and PDX line. Intervals are plotted on the same scale to highlight the differential tumor growth rates.
