# Supplementary material
Source: PubMed Central journal article supplement (PMC6235171)
Supplement: NIHMS995301-supplement-S6_Data.pdf [file NIHMS995301-supplement-S6_Data.pdf]

### A NF1-MET

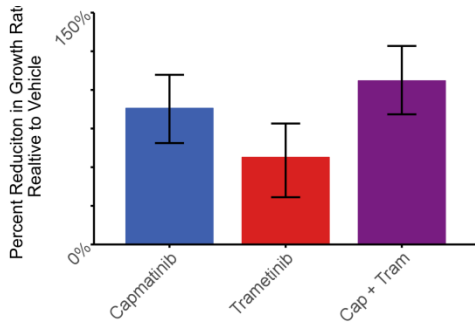

### B NF1-P53

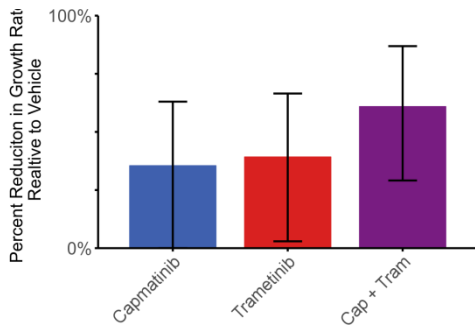

### C NF1

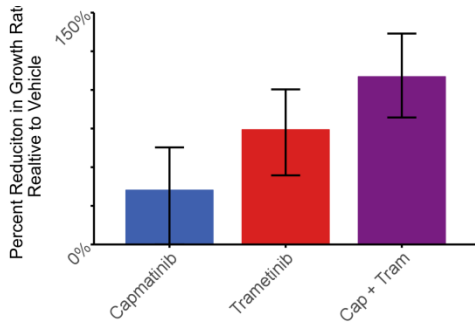

**Supplemental Figure 6:** Mean percent reduction in growth rates of A) NF1-MET, B) NF1-P53, and C) NF1 mice treated with each treatment arm versus vehicle. Error bars are the bootstrap 95th percentile interval, estimated based on 10,000 resampled datasets.
